# Supplementary material
Source: MDPI journal article supplement (https://www.mdpi.com/2297-8739/7/4/63)
Supplement: s1 [file s1]

1 Article

2 **Screening Carpet Substrate Interferences in Arson**  
 3 **Identification by Solid Phase Microextraction and**  
 4 **Gas Chromatography-Mass Spectrometry**

5 Alyssa Aldrich, Edna Gennarino-Lopez, Gabriel Odugbesi, Kaylandra Woodside and Shokouh  
 6 Haddadi \*

7 Department of Chemistry, State University of New York at Oswego, Oswego, NY 13126, USA;  
 8 aaldrich@oswego.edu (A.A.); egennari@oswego.edu (E.G.-L.); godugbes@oswego.edu (G.O.);  
 9 kwoodsid@oswego.edu (K.W.)

10 \* Correspondence: shokouh.haddadi@oswego.edu

11 Received: 23 October 2020; Accepted: 16 November 2020; Published: 18 November 2020

12 **Extracted ion data for unburned neat ignitable liquids (Section 3.1)**

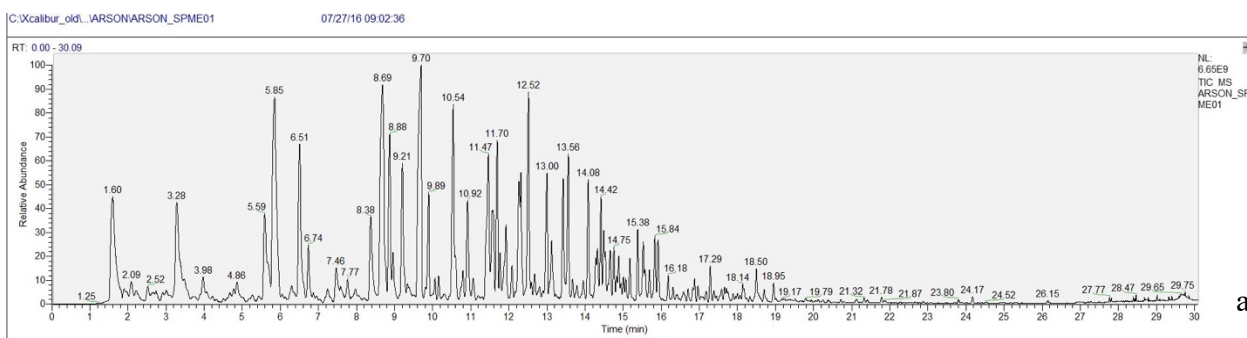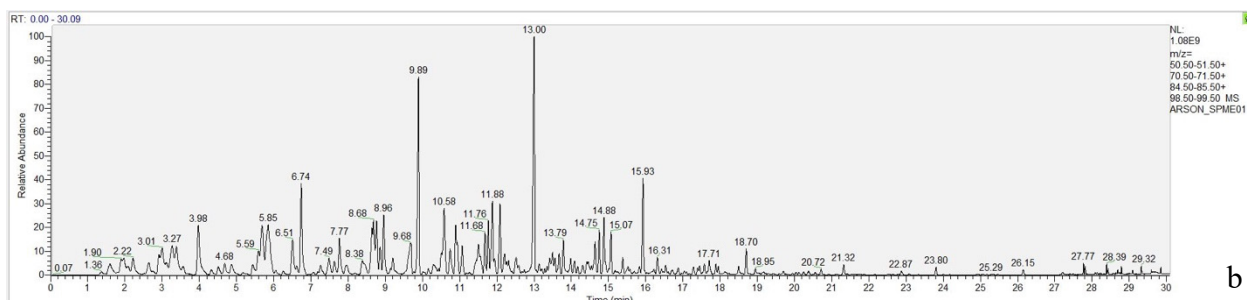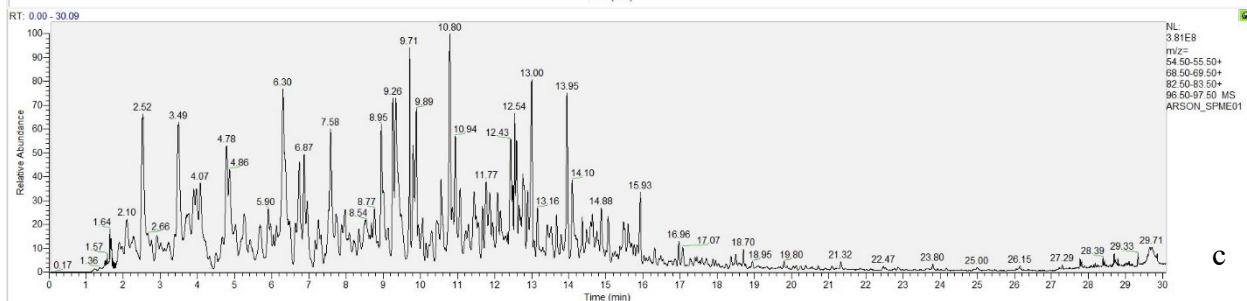

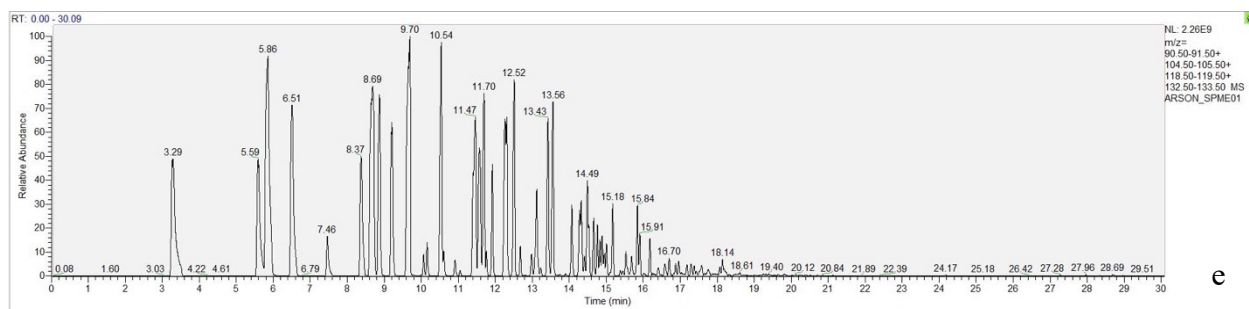

17  
18

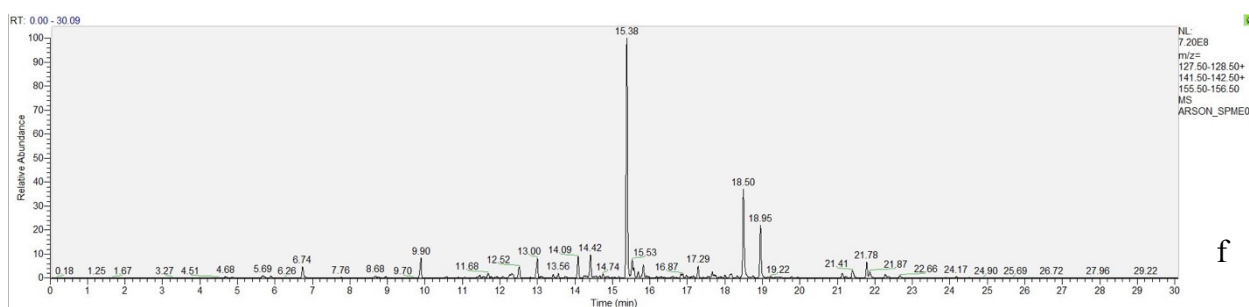

19

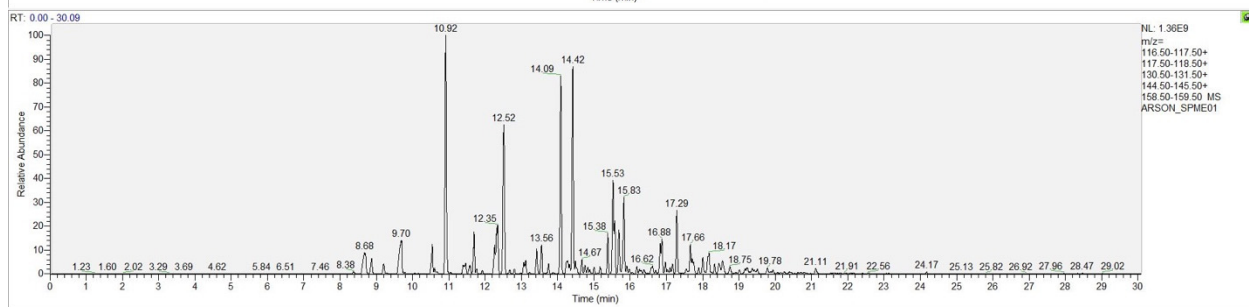

20

21

22

23

**Figure S1.** GC-MS extracted ion data related to neat gasoline. (a) Total ion chromatogram; (b) extracted alkane profile; (c) extracted cycloalkanes and alkenes profile; (d) aromatics (alkylbenzenes) profile; (e) extracted polynuclear aromatics profile; (f) extracted indane profile.

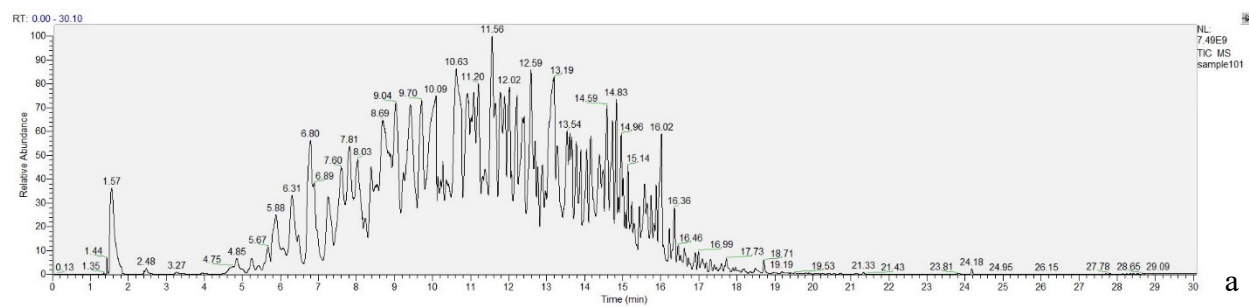

24

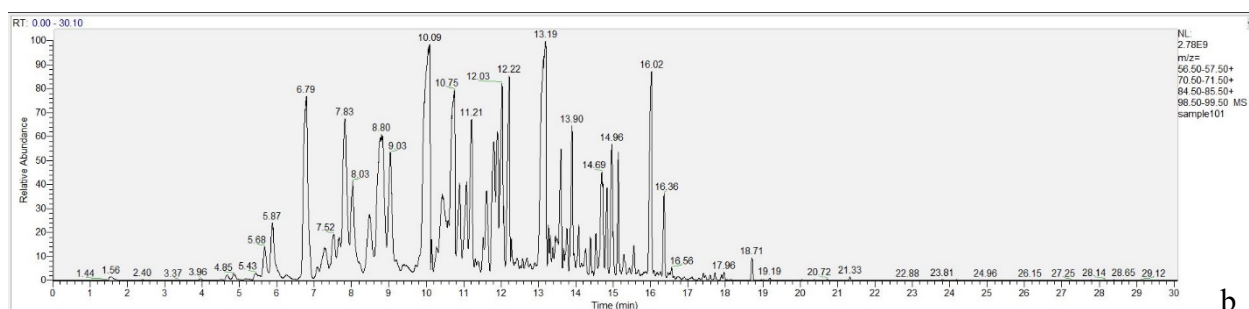

25

26

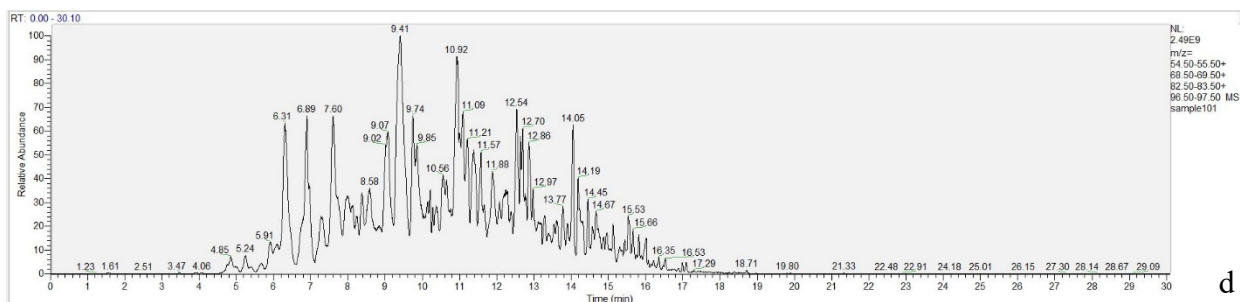

d

27

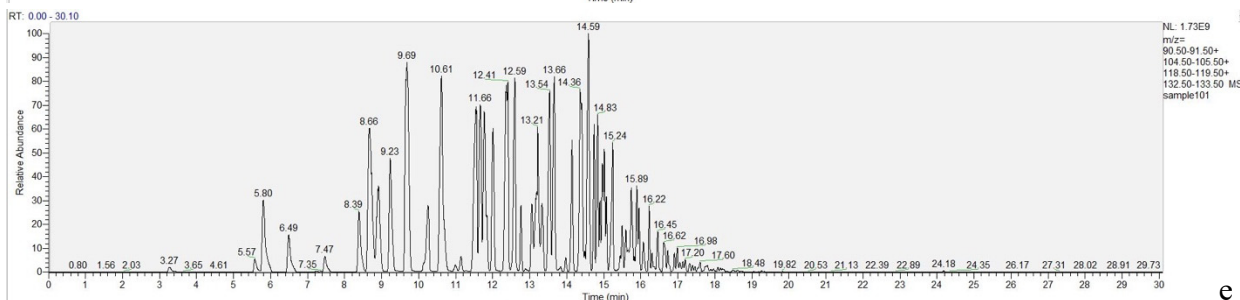

e

28

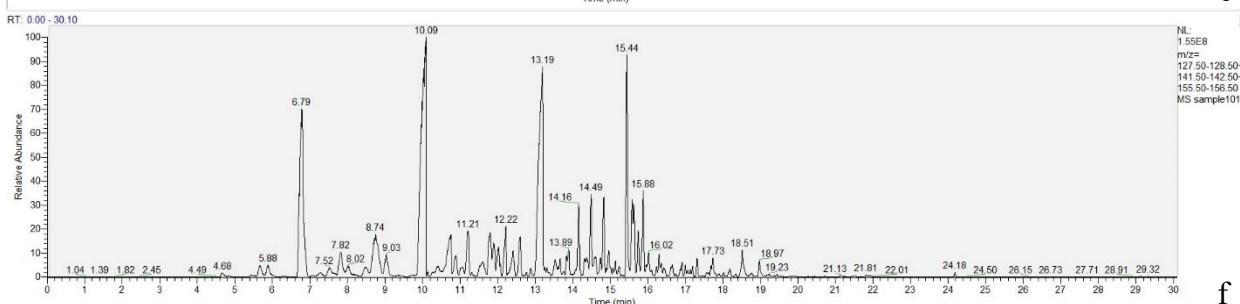

f

29

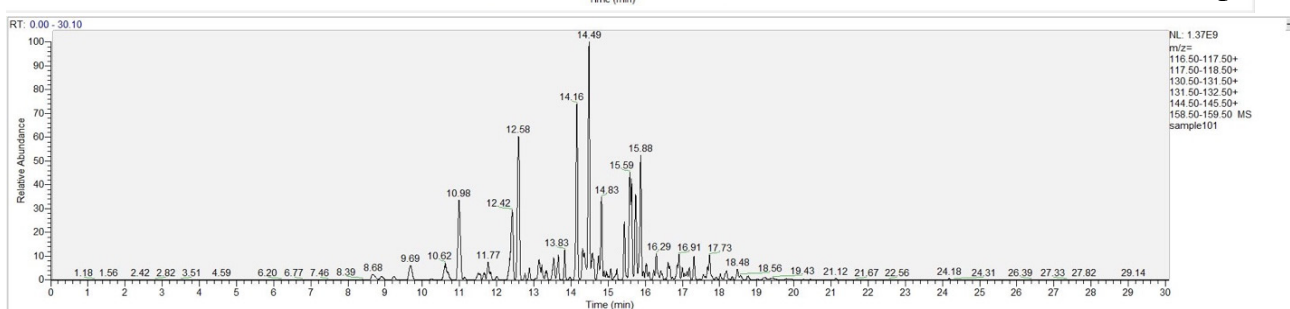

30

**Figure S2.** GC-MS extracted ion data related to neat kerosene. (a) Total ion chromatogram; (b) extracted alkane profile; (c) extracted cycloalkanes and alkenes profile; (d) aromatics (alkylbenzenes) profile; (e) extracted polynuclear aromatics profile; (f) extracted indane profile.

31

32 **Extracted ion data for carpet substrates (Section 3.2)**

33 *Extracted ion data for Carpet#1 Stain Master Pet Protect (nylon 6,6) (Section 3.2.1)*

35

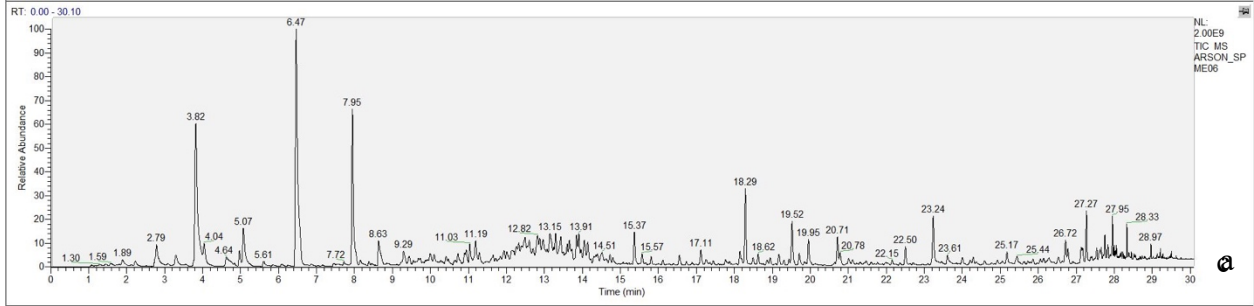

36

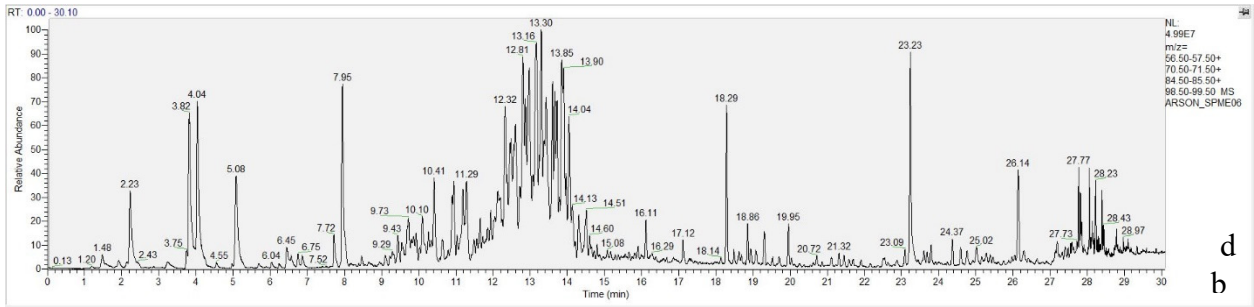

37

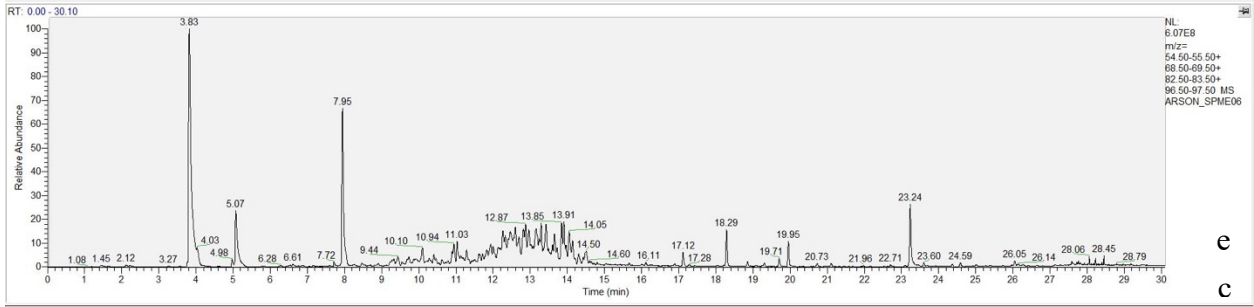

38

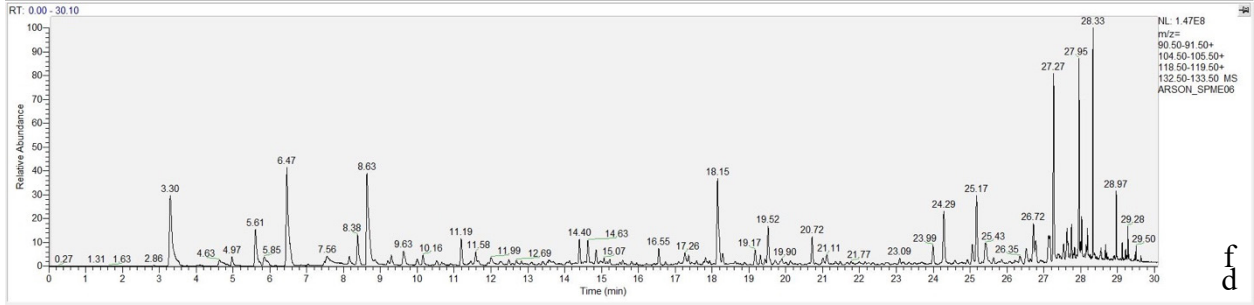

39

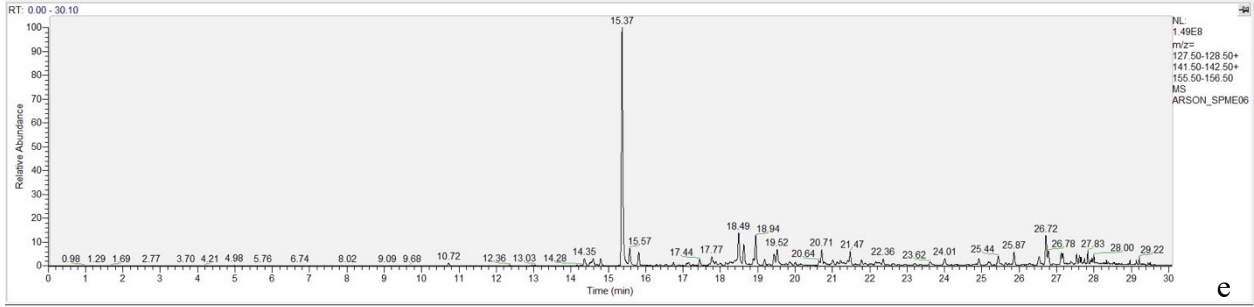

40

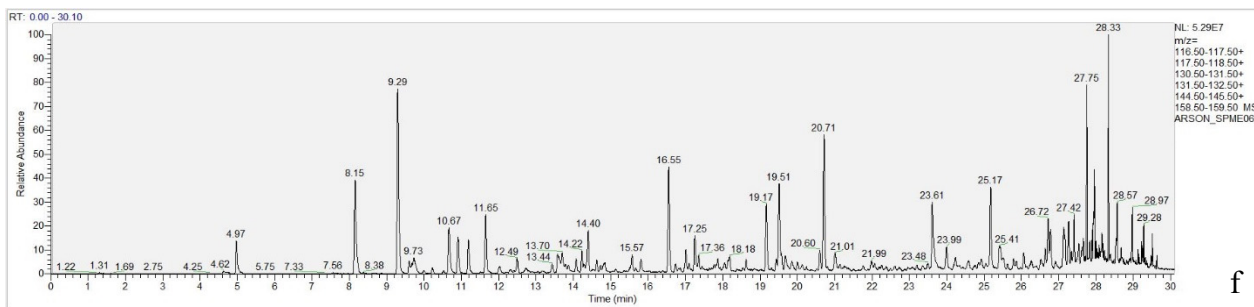

41  
42  
43  
44

**Figure S3.** GC-MS extracted ion data related to Carpet#1, Stain Master Pet Protect Dyed BCF Nylon 6,6 burned without ILs. (a) Total ion chromatogram; (b) extracted alkane profile; (c) extracted cycloalkanes and alkenes profile; (d) aromatics (alkylbenzenes) profile; (e) extracted polynuclear aromatics profile; (f) extracted indane profile.

45

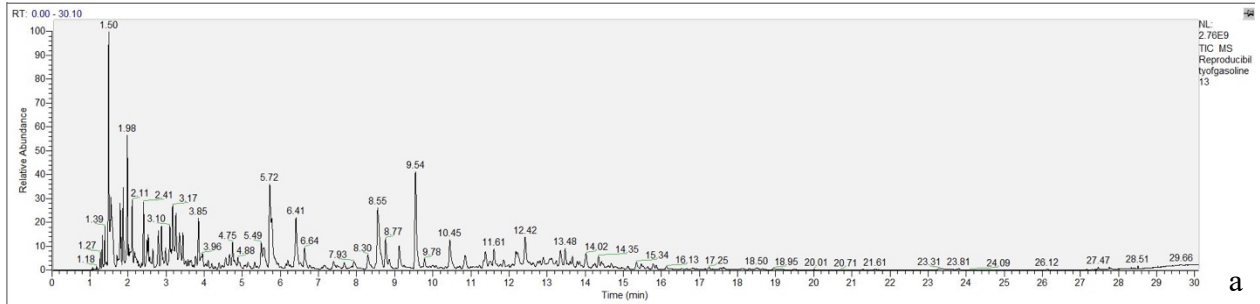

46

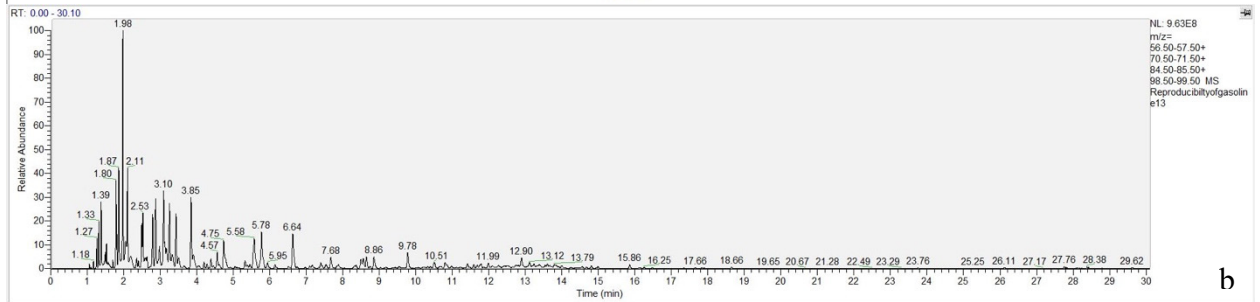

47

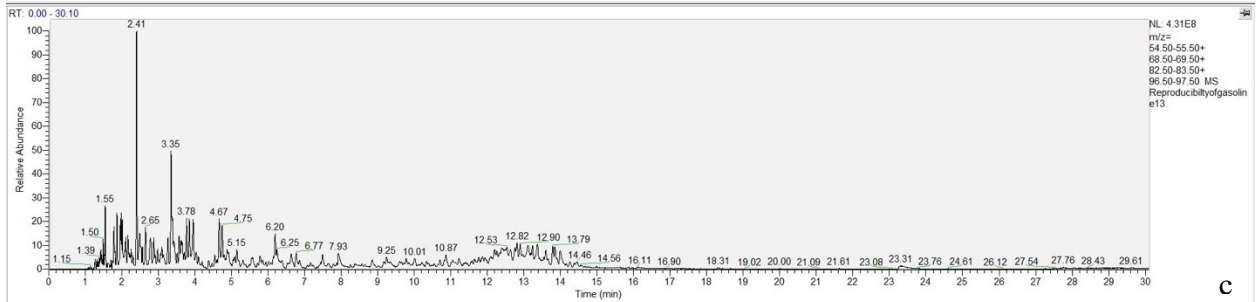

48

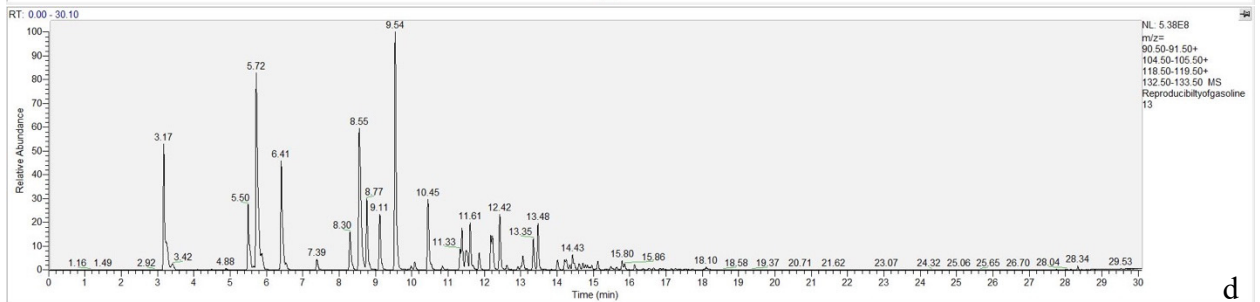

49

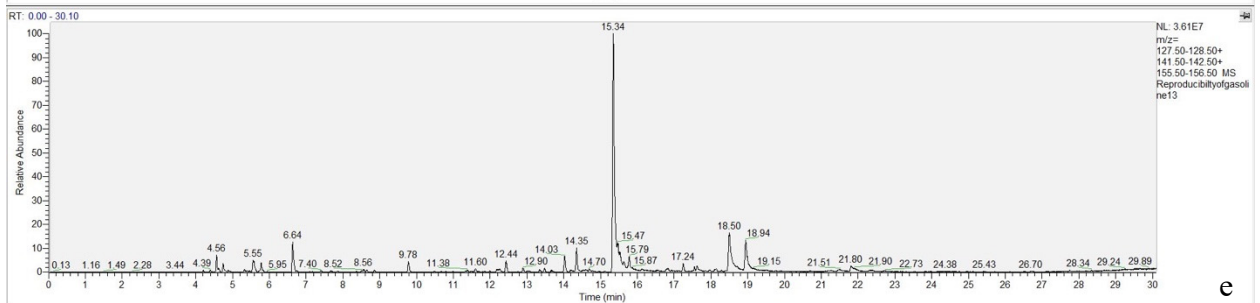



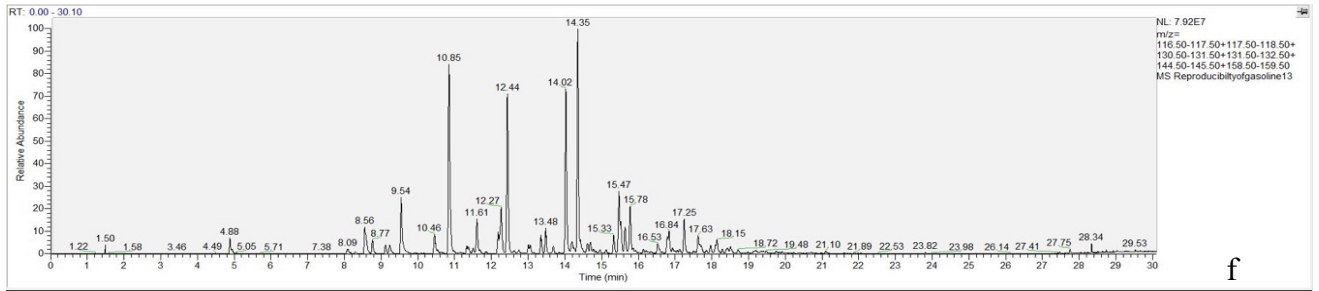

50

51

52

53

54

**Figure S4.** GC-MS extracted ion data related to Carpet#1, Stain Master Pet Protect Dyed BCF Nylon 6,6 burned with gasoline. (a) Total ion chromatogram; (b) extracted alkane profile; (c) extracted cycloalkanes and alkenes profile; (d) aromatics (alkylbenzenes) profile; (e) extracted polynuclear aromatics profile; (f) extracted indane profile.

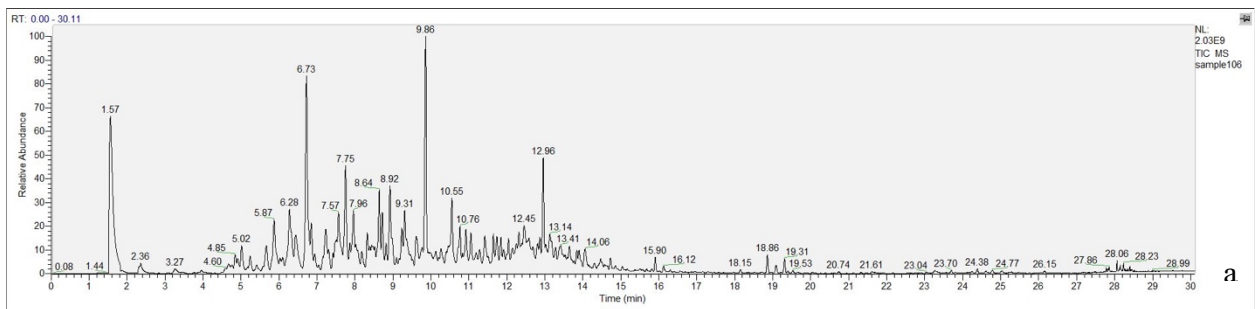

55

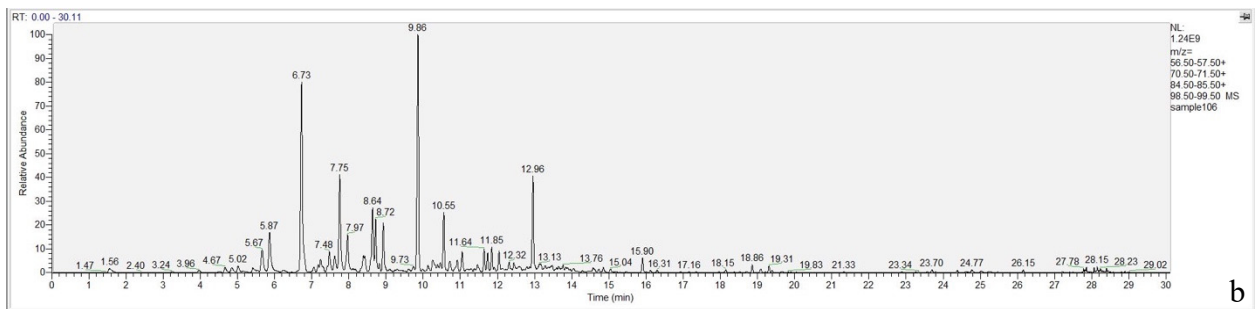

56

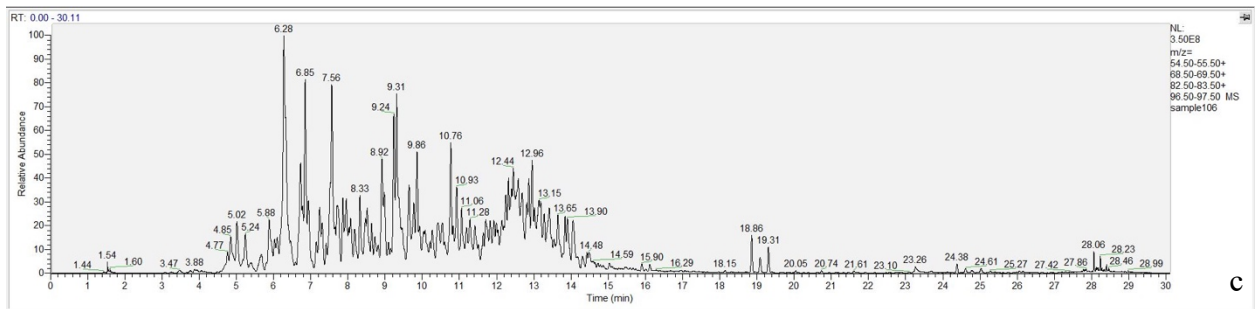

57

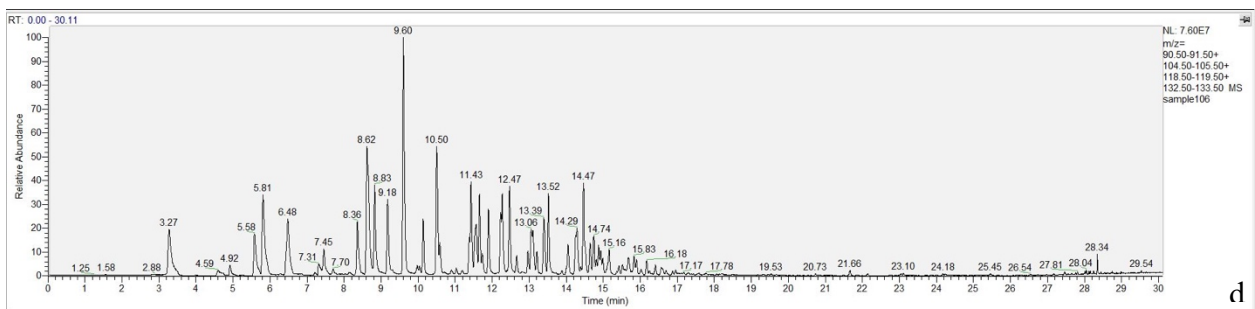

58

59

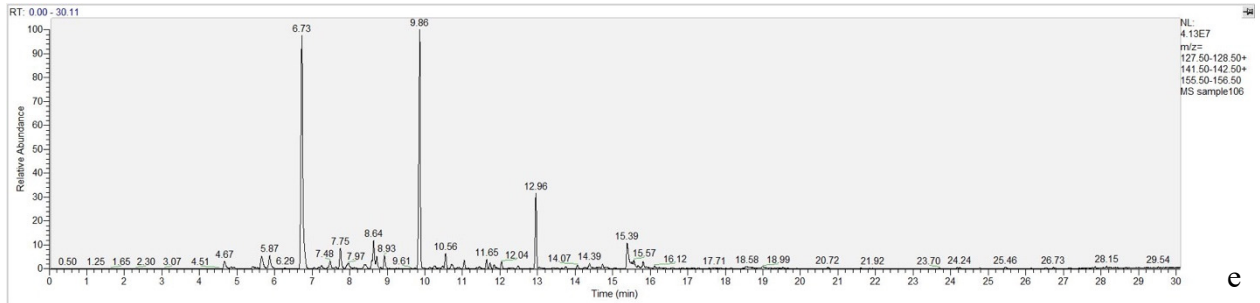

60

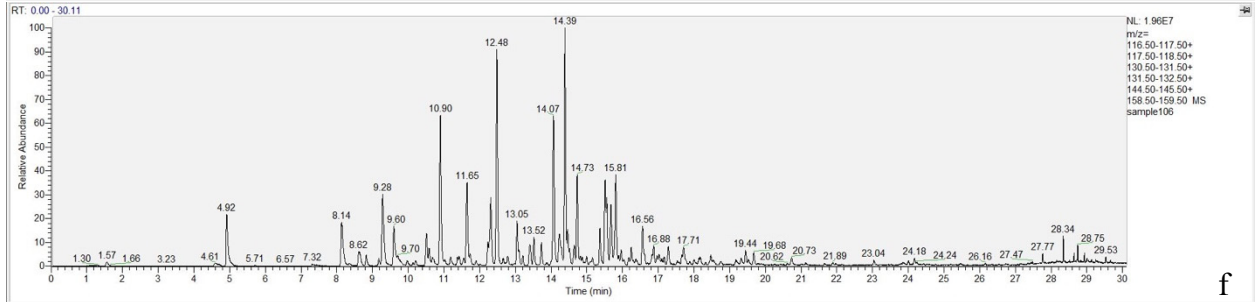

61  
62  
63  
64

**Figure S5.** GC-MS extracted ion data related to Carpet#1, Stain Master Pet Protect Dyed BCF Nylon 6,6, burned with kerosene. (a) Total ion chromatogram; (b) extracted alkane profile; (c) extracted cycloalkanes and alkenes profile; (d) aromatics (alkylbenzenes) profile; (e) extracted polynuclear aromatics profile; (f) extracted indane profile.

65

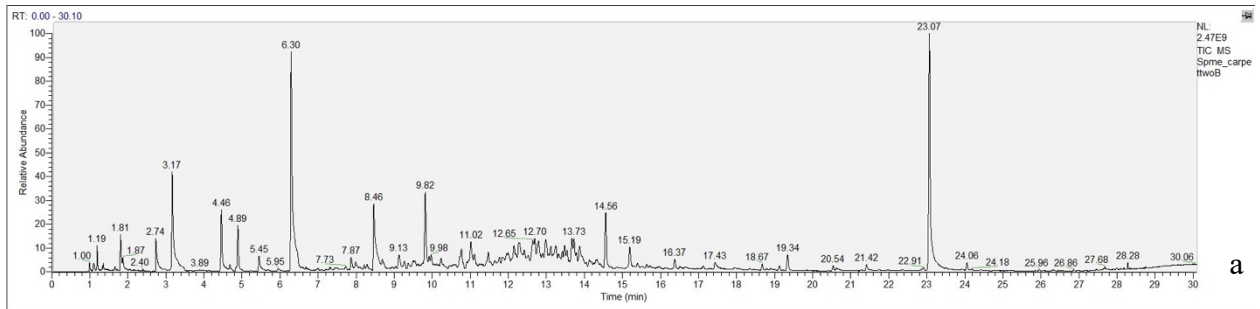

66

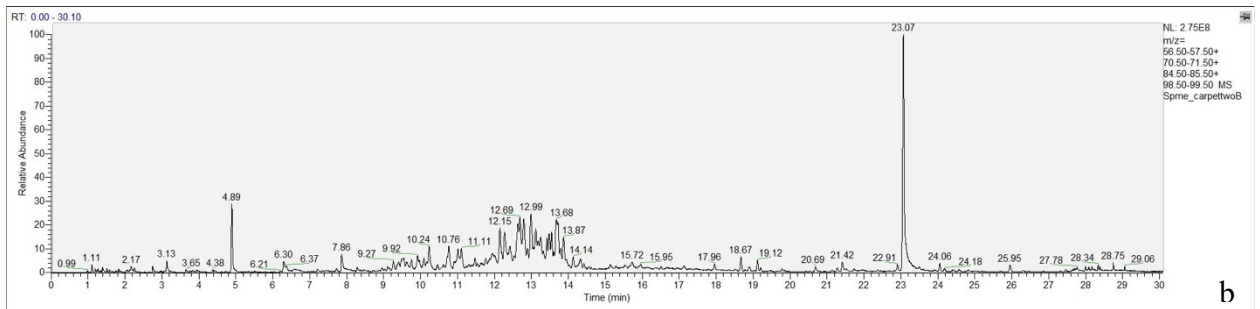

67

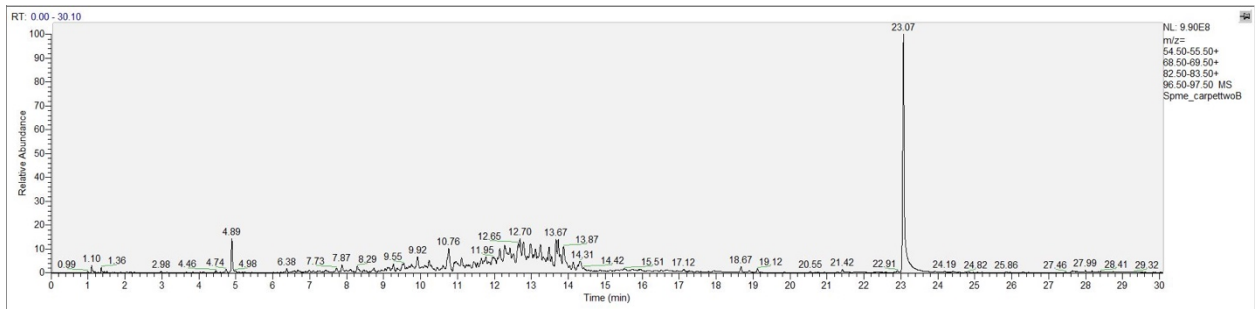

c

68

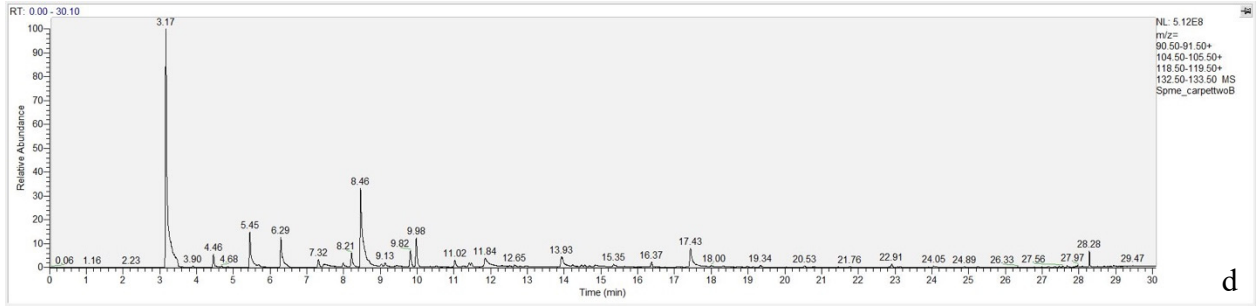

69

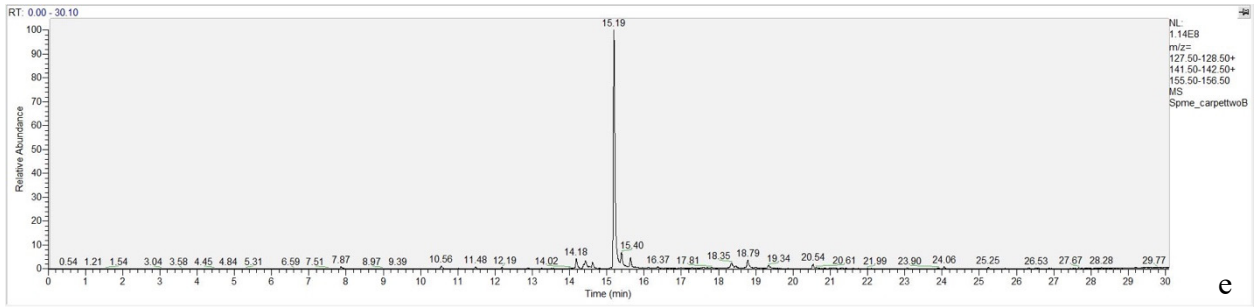

70

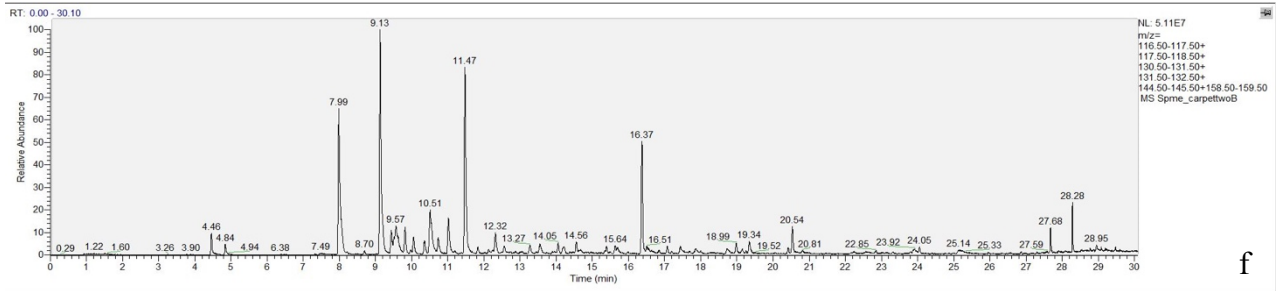

71  
72  
73  
74

**Figure S6.** GC-MS extracted ion data related to carpet#2, Stain Master Essential Carpet (polyester) burned without ILs. (a) Total ion chromatogram; (b) extracted alkane profile; (c) extracted cycloalkanes and alkenes profile; (d) aromatics (alkylbenzenes) profile; (e) extracted polynuclear aromatics profile; (f) extracted indane profile.

75

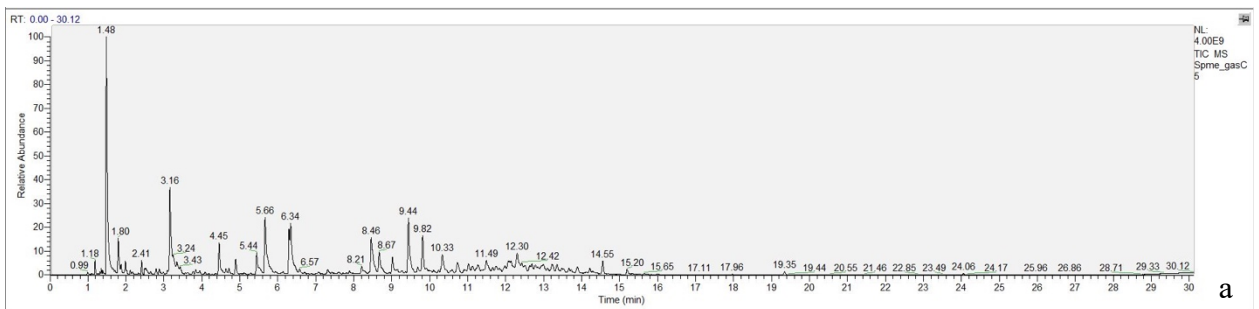

76

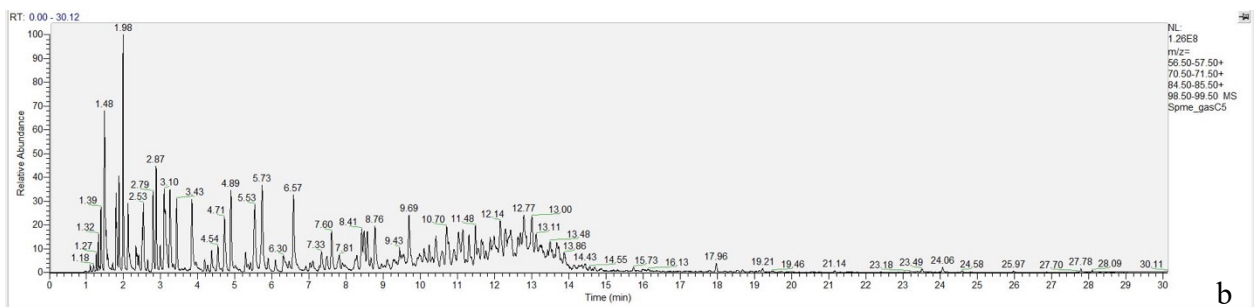



77

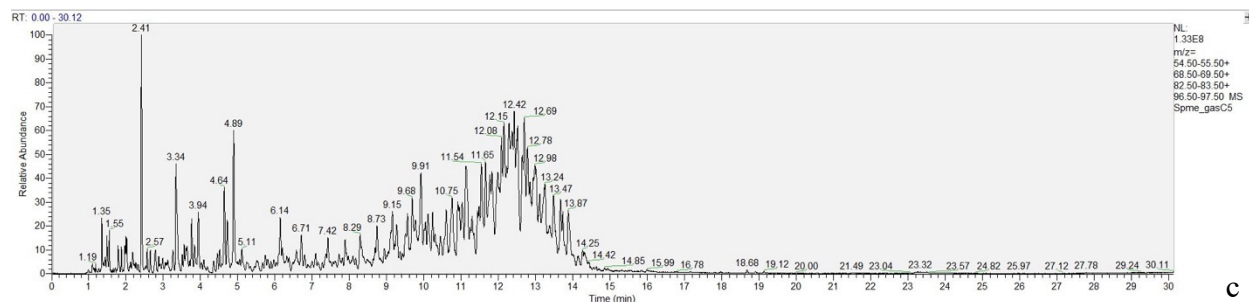

78

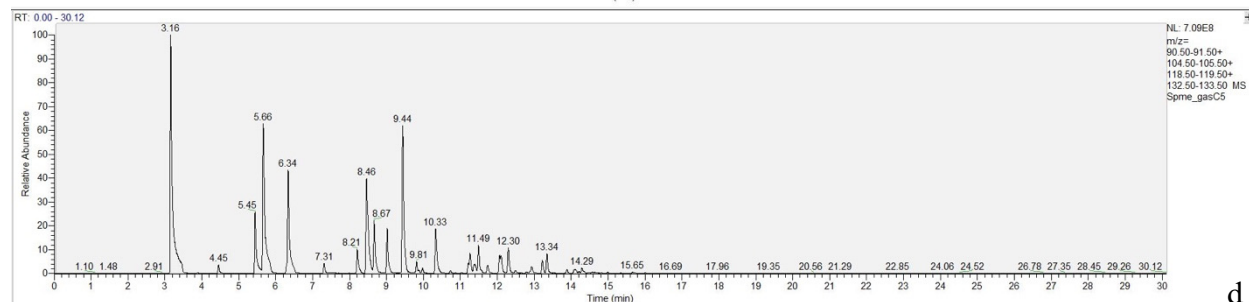

79

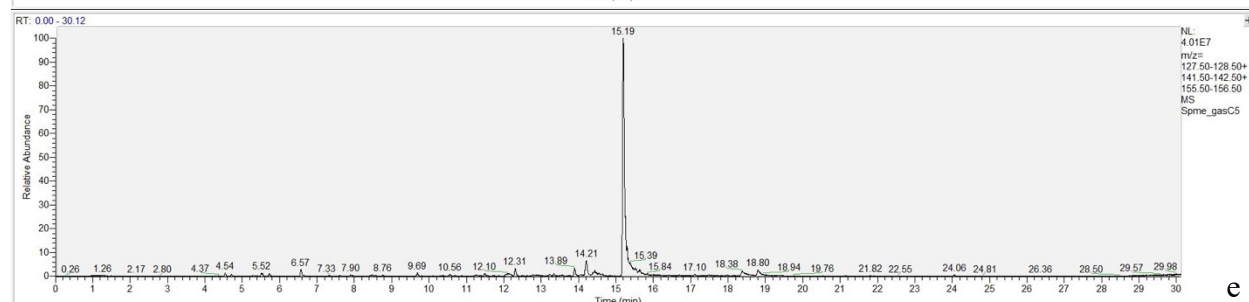

80

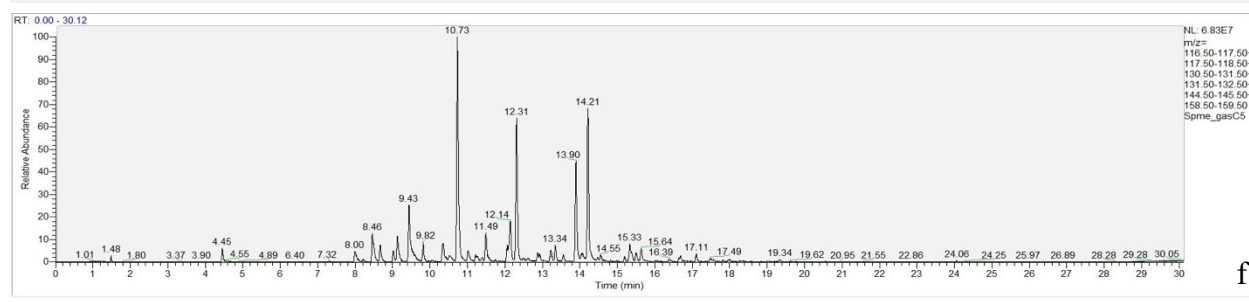

81 **Figure S7.** GC-MS extracted ion data related to carpet#2, Stain Master Essential Carpet (polyester)  
 82 burned with gasoline. (a) Total ion chromatogram; (b) extracted alkane profile; (c) extracted  
 83 cycloalkanes and alkenes profile; (d) aromatics (alkylbenzenes) profile; (e) extracted polynuclear  
 84 aromatics profile; (f) extracted indane profile.

85

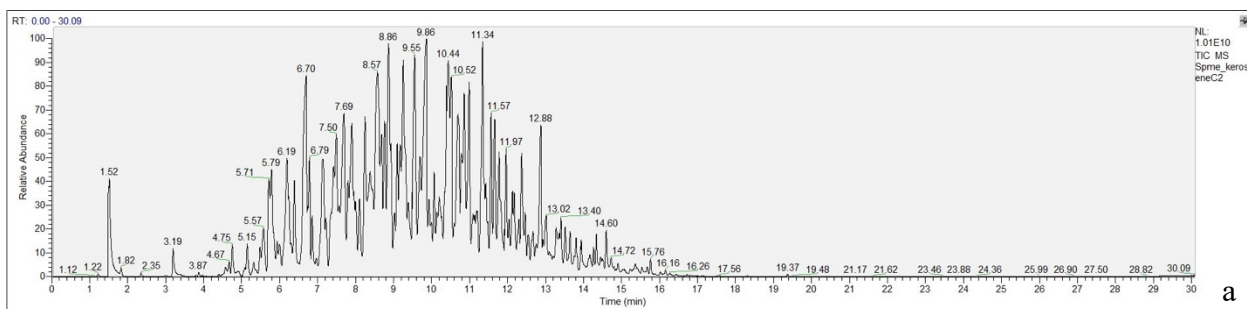

86

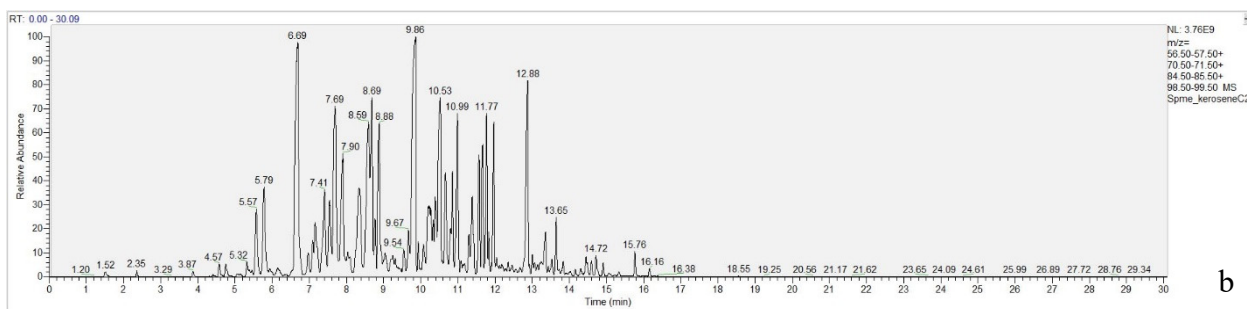

87

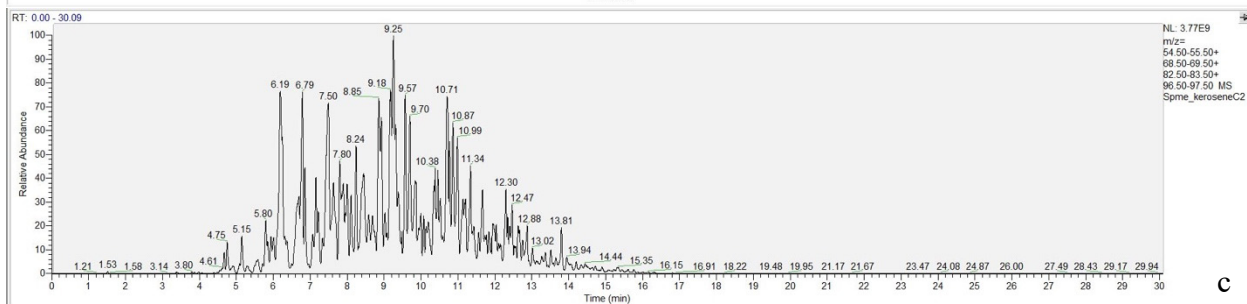

88

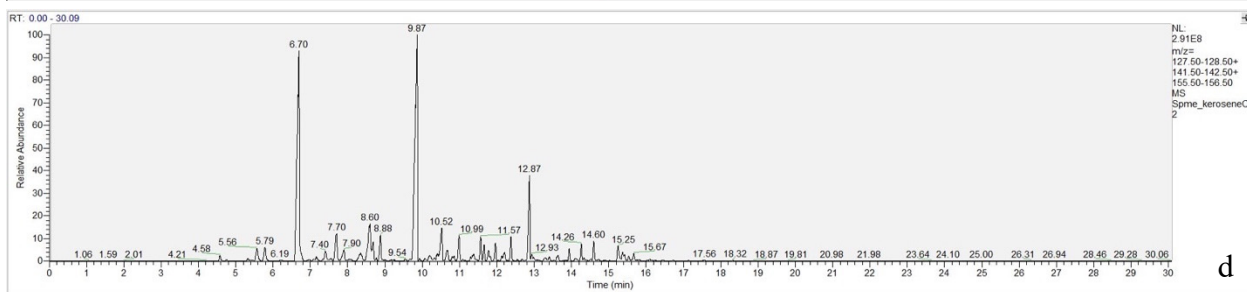

89

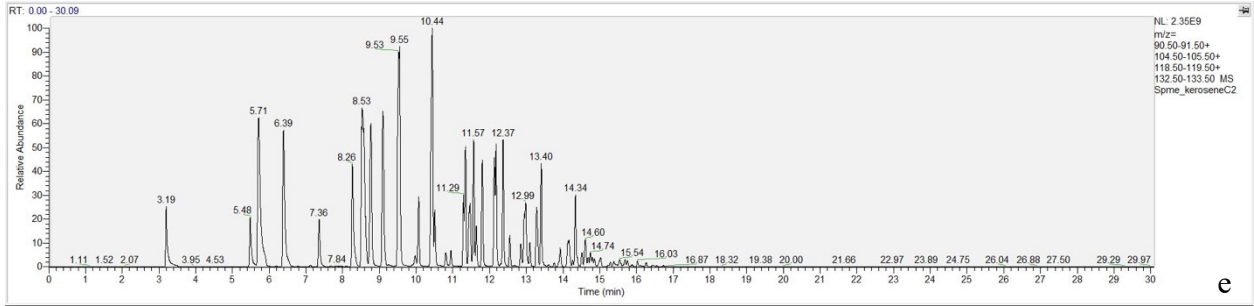

90

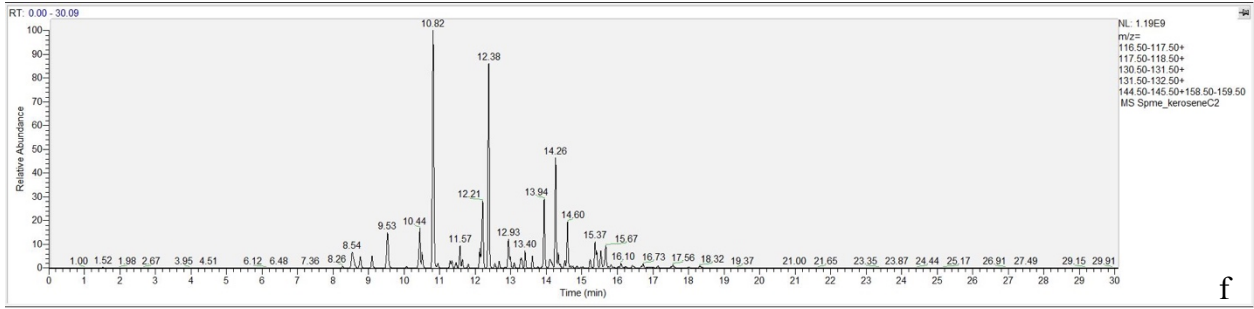

91

**Figure S8.** GC-MS extracted ion data related to carpet#2, Stain Master Essential Carpet (polyester) burned with kerosene. (a) Total ion chromatogram; (b) extracted alkane profile; (c) extracted cycloalkanes and alkenes profile; (d) aromatics (alkylbenzenes) profile; (e) extracted polynuclear aromatics profile; (f) extracted indane profile.

92

93

94

95

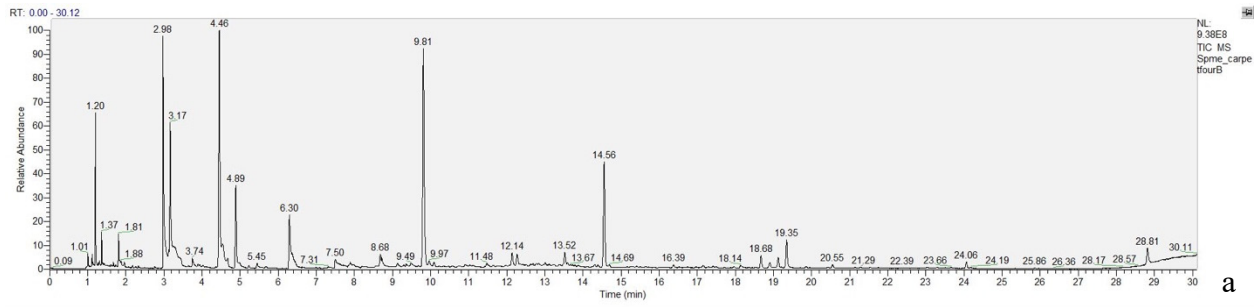

96

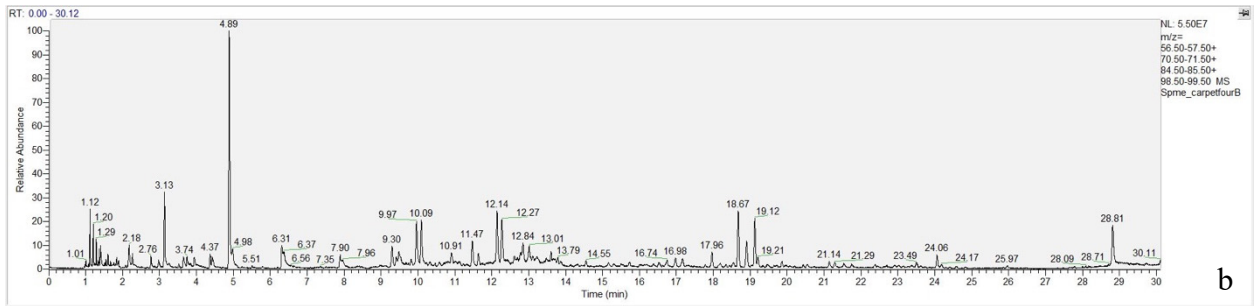

97

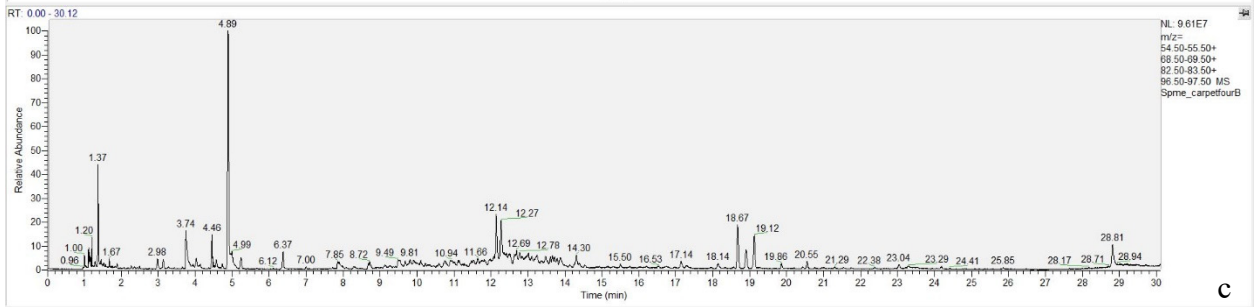

98

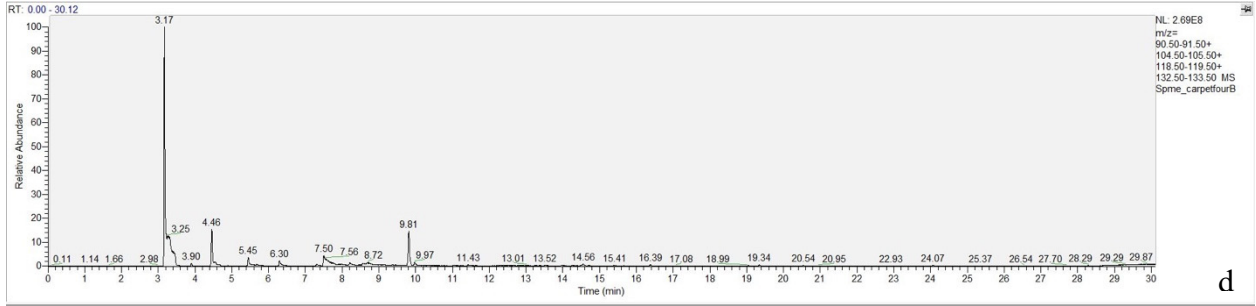

d

99

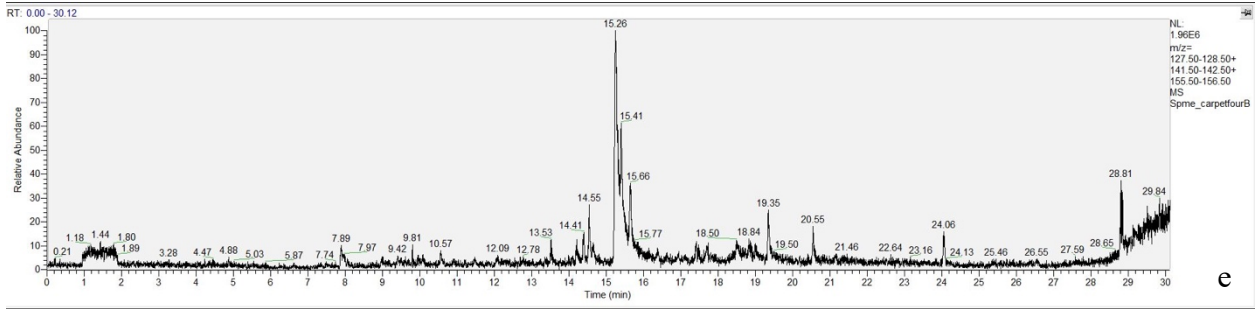

e

100

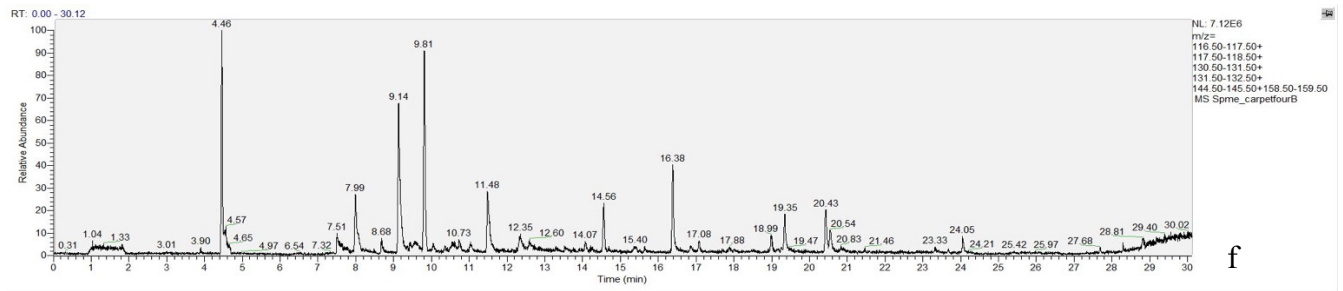

f

101  
102  
103  
104

**Figure S9.** GC-MS extracted ion data related to carpet#3, Berber 100% Dyed Polyester Carpet burned without ILs. (a) Total ion chromatogram; (b) extracted alkane profile; (c) extracted cycloalkanes and alkenes profile; (d) aromatics (alkylbenzenes) profile; (e) extracted polynuclear aromatics profile; (f) extracted indane profile.

105

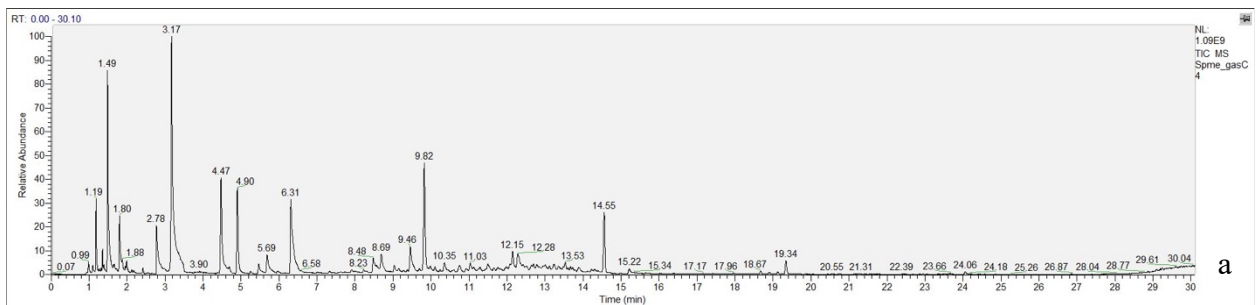

a

106

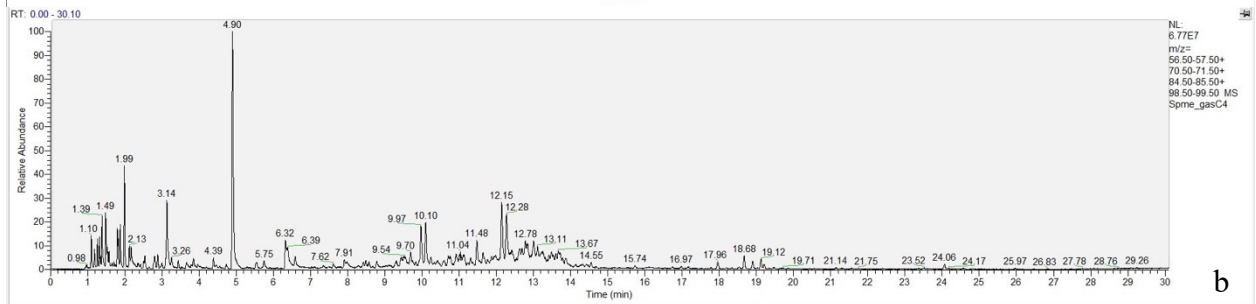

b

107

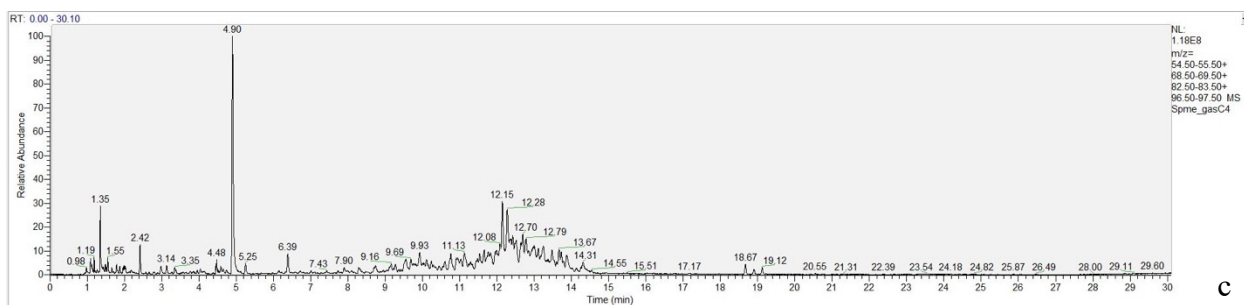

108

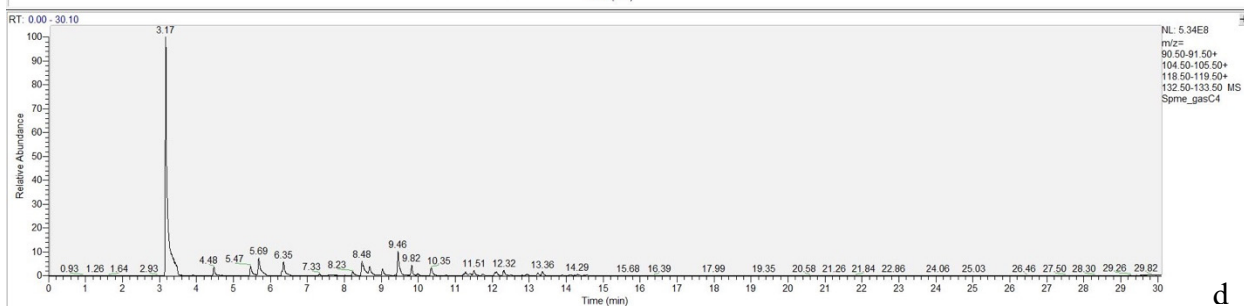

109

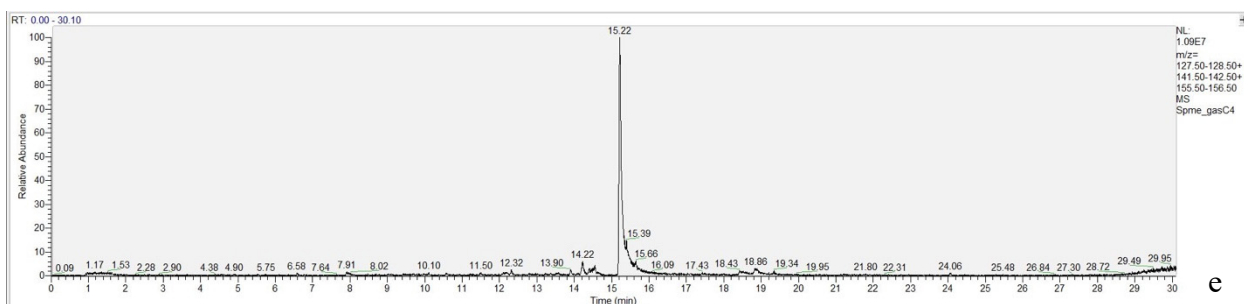

110

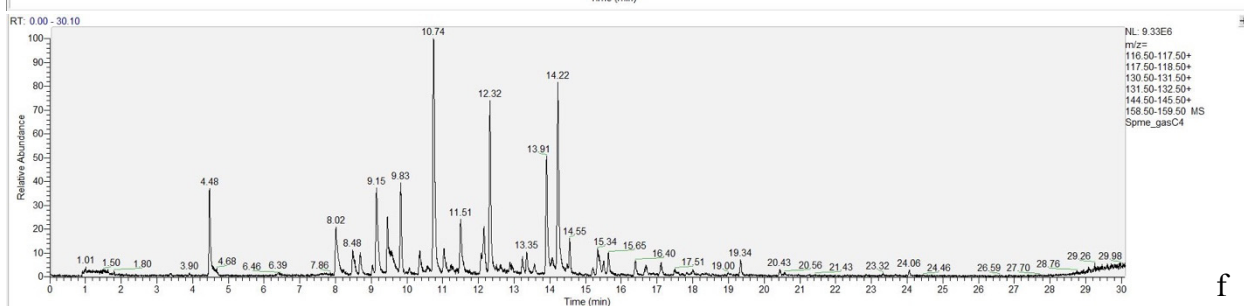

111 **Figure S10.** GC-MS extracted ion data related to carpet#3, Berber 100% Dyed Polyester Carpet burned with  
 112 gasoline. (a) Total ion chromatogram; (b) extracted alkane profile; (c) extracted cycloalkanes and  
 113 alkenes profile; (d) aromatics (alkylbenzenes) profile; (e) extracted polynuclear aromatics profile; (f)  
 114 extracted indane profile.



115

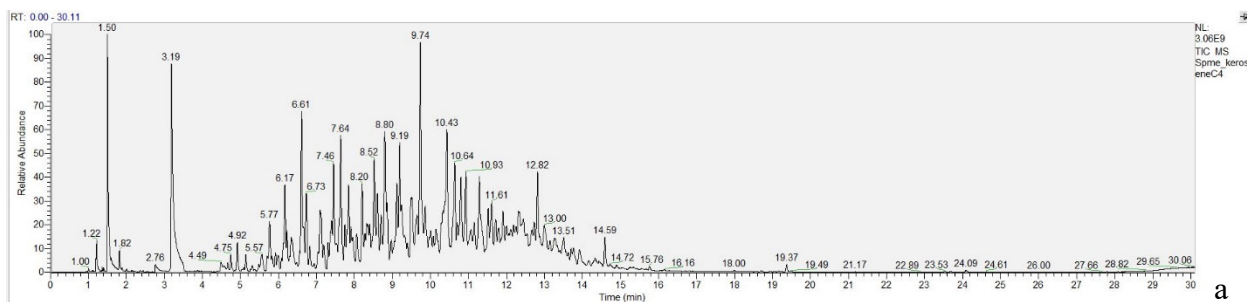

116

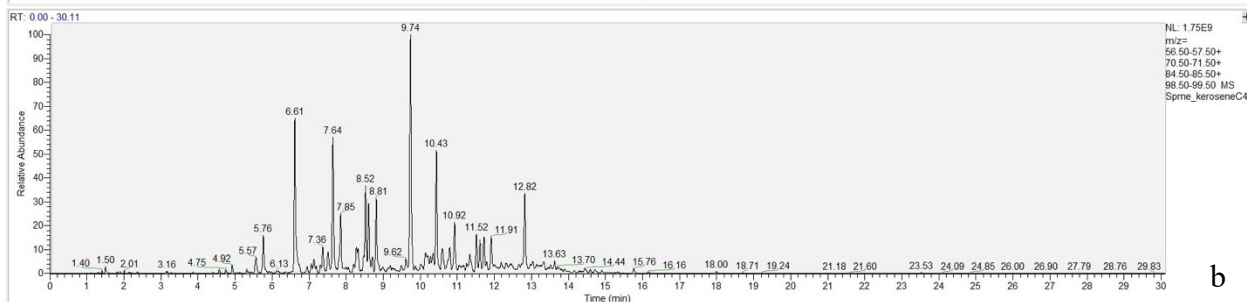

117

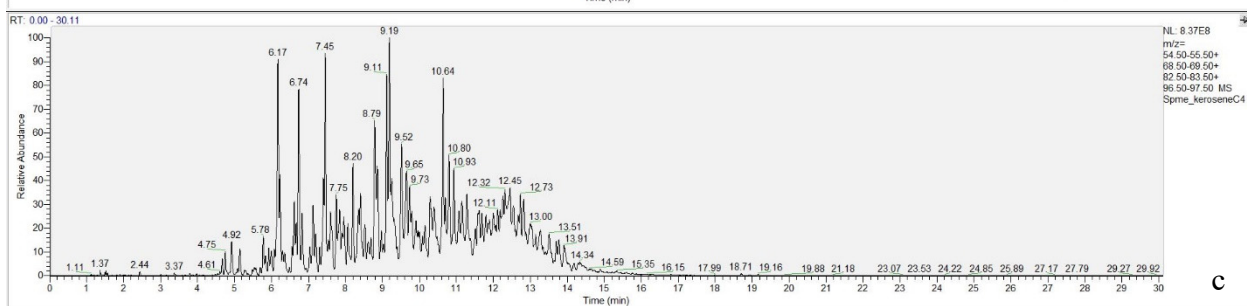

118

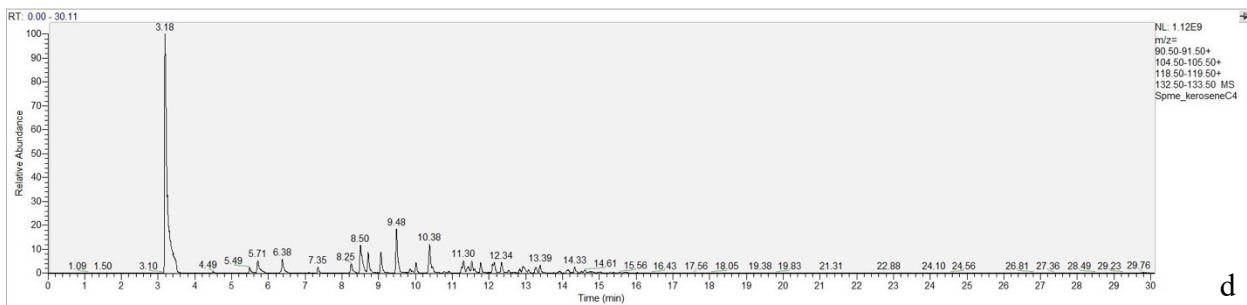

119

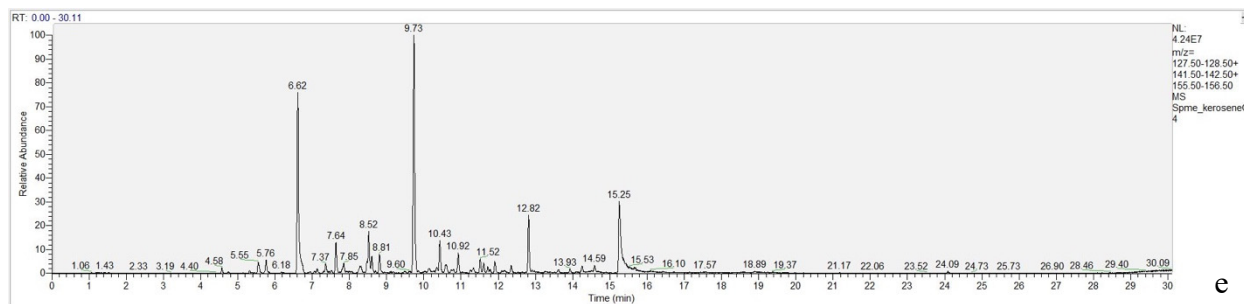

120

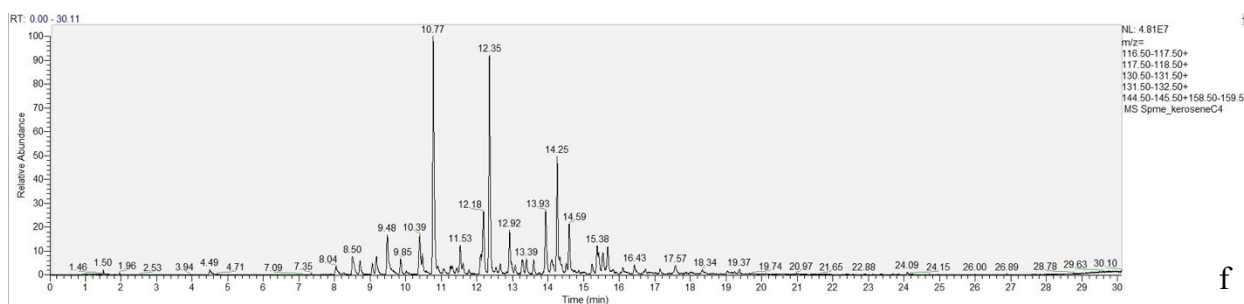

121

122

123

124

**Figure S11.** GC-MS extracted ion data related to carpet#3, Berber 100% Dyed Polyester carpet burned with kerosene. (a) Total ion chromatogram; (b) extracted alkane profile; (c) extracted cycloalkanes and alkenes profile; (d) aromatics (alkylbenzenes) profile; (e) extracted polynuclear aromatics profile; (f) extracted indane profile.

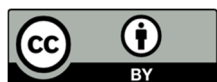

© 2020 by the authors. Licensee MDPI, Basel, Switzerland. This article is an open access article distributed under the terms and conditions of the Creative Commons Attribution (CC BY) license (<http://creativecommons.org/licenses/by/4.0/>).

125
